# Supplementary material for: Oncogenic protein SALL4 and ZNF217 as prognostic indicators in solid cancers: a meta-analysis of individual studies
Source: PubMed Central journal article supplement (PMC5029703; doi:10.18632/oncotarget.8237), 2016-03-21
Supplement: oncotarget-07-24314-s001.pdf [file oncotarget-07-24314-s001.pdf]

# Oncogenic protein SALL4 and ZNF217 as prognostic indicators in solid cancers: a meta-analysis of individual studies

## Supplementary Materials

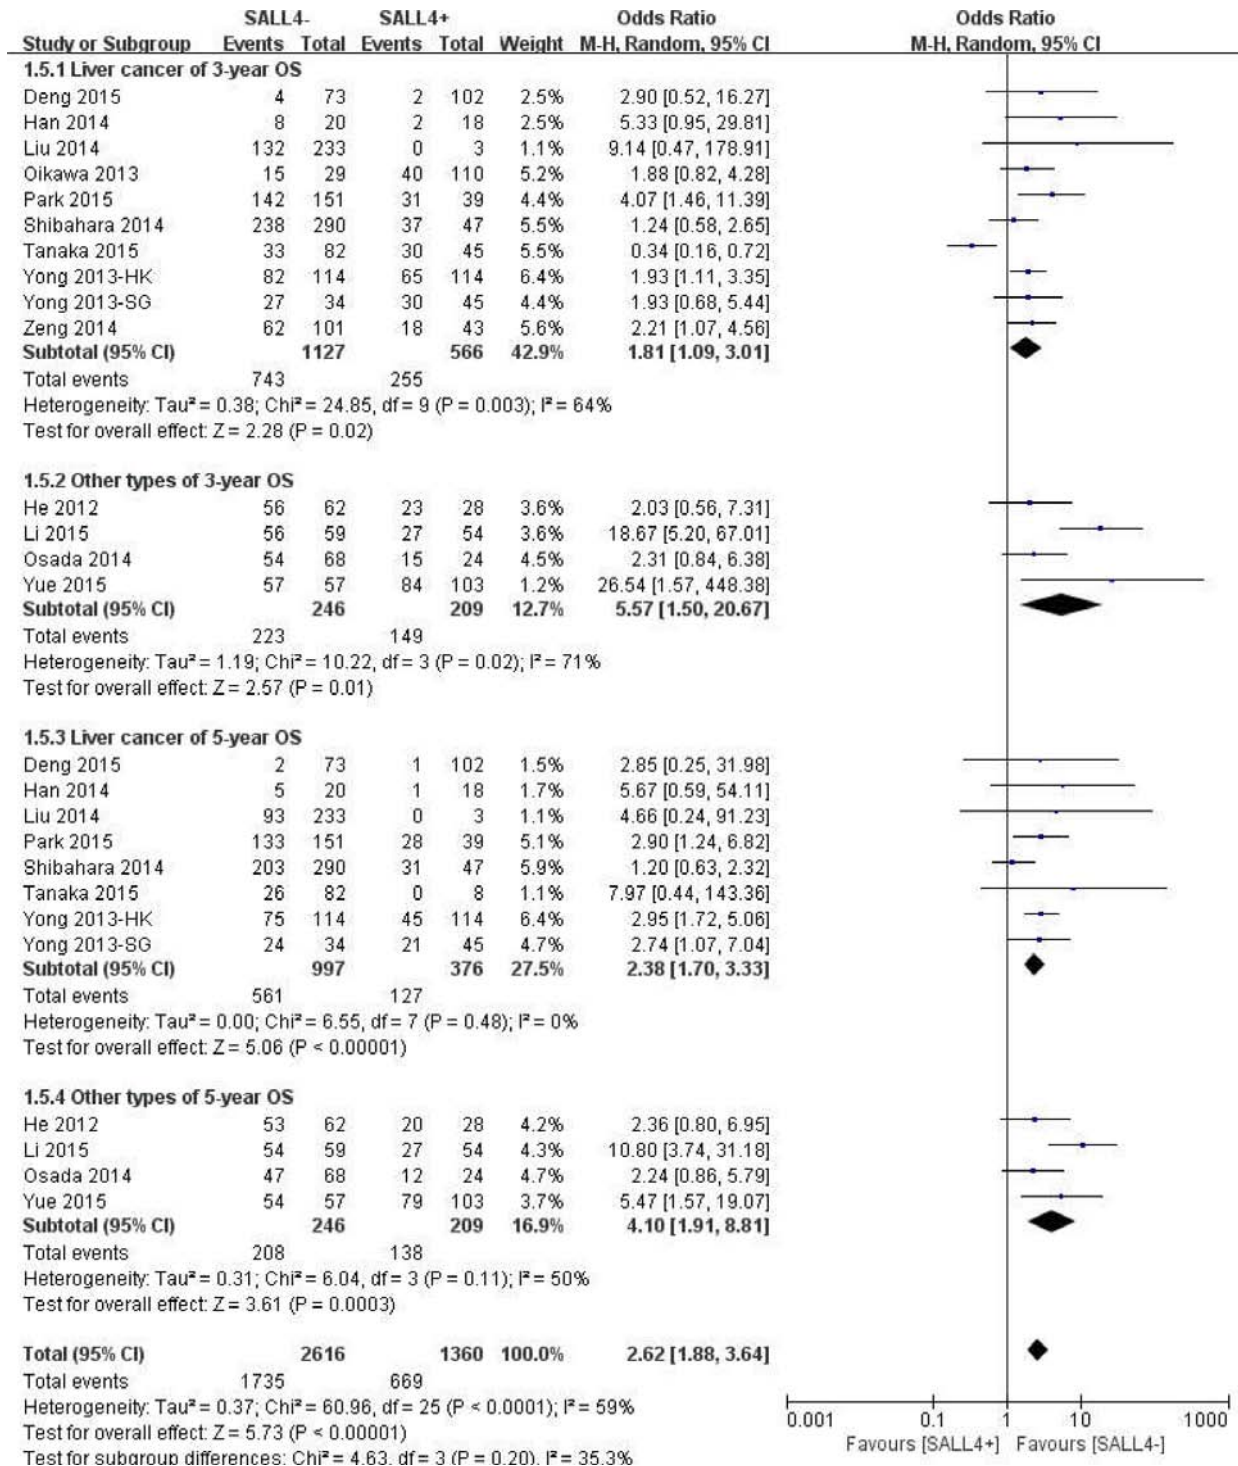

Supplementary Figure S1: The correlation between SALL4 expression and prognosis based on different cancer types.

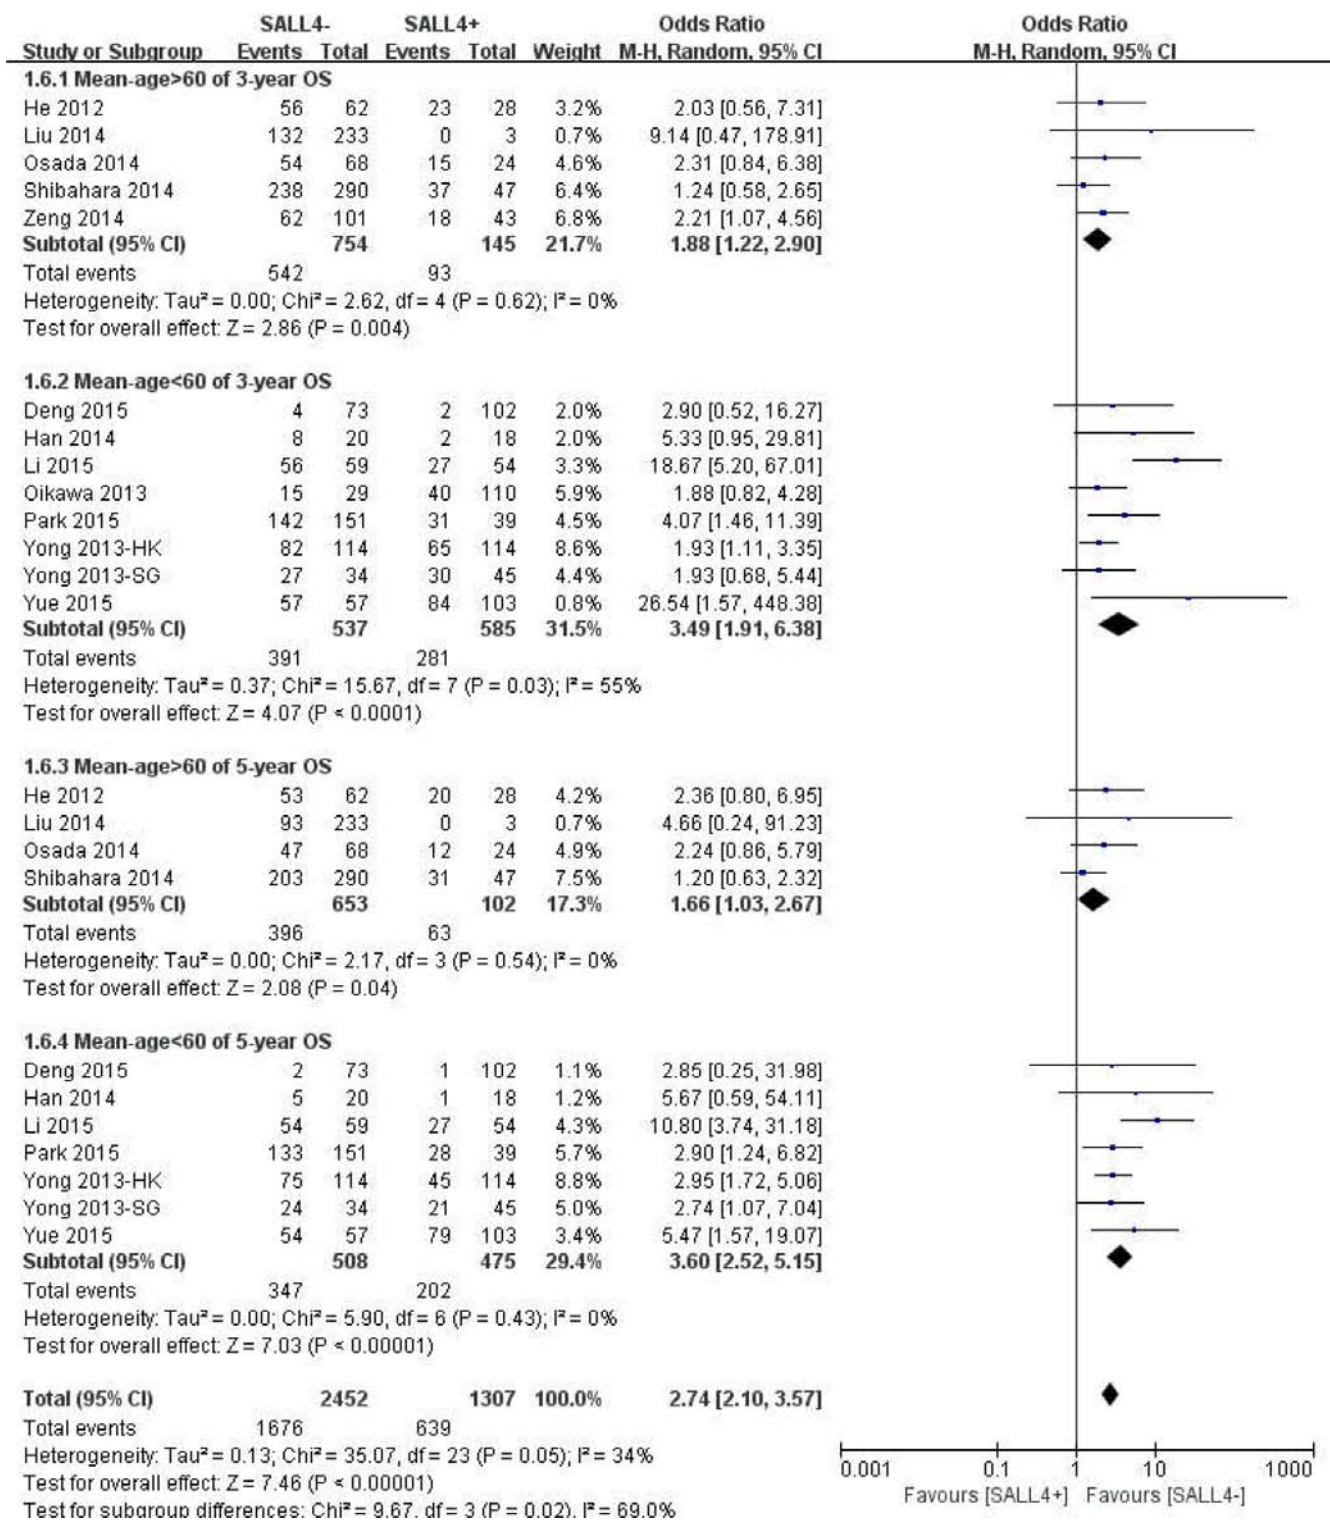

Supplementary Figure S2: The correlation between SALL4 expression and prognosis based on different mean-age.

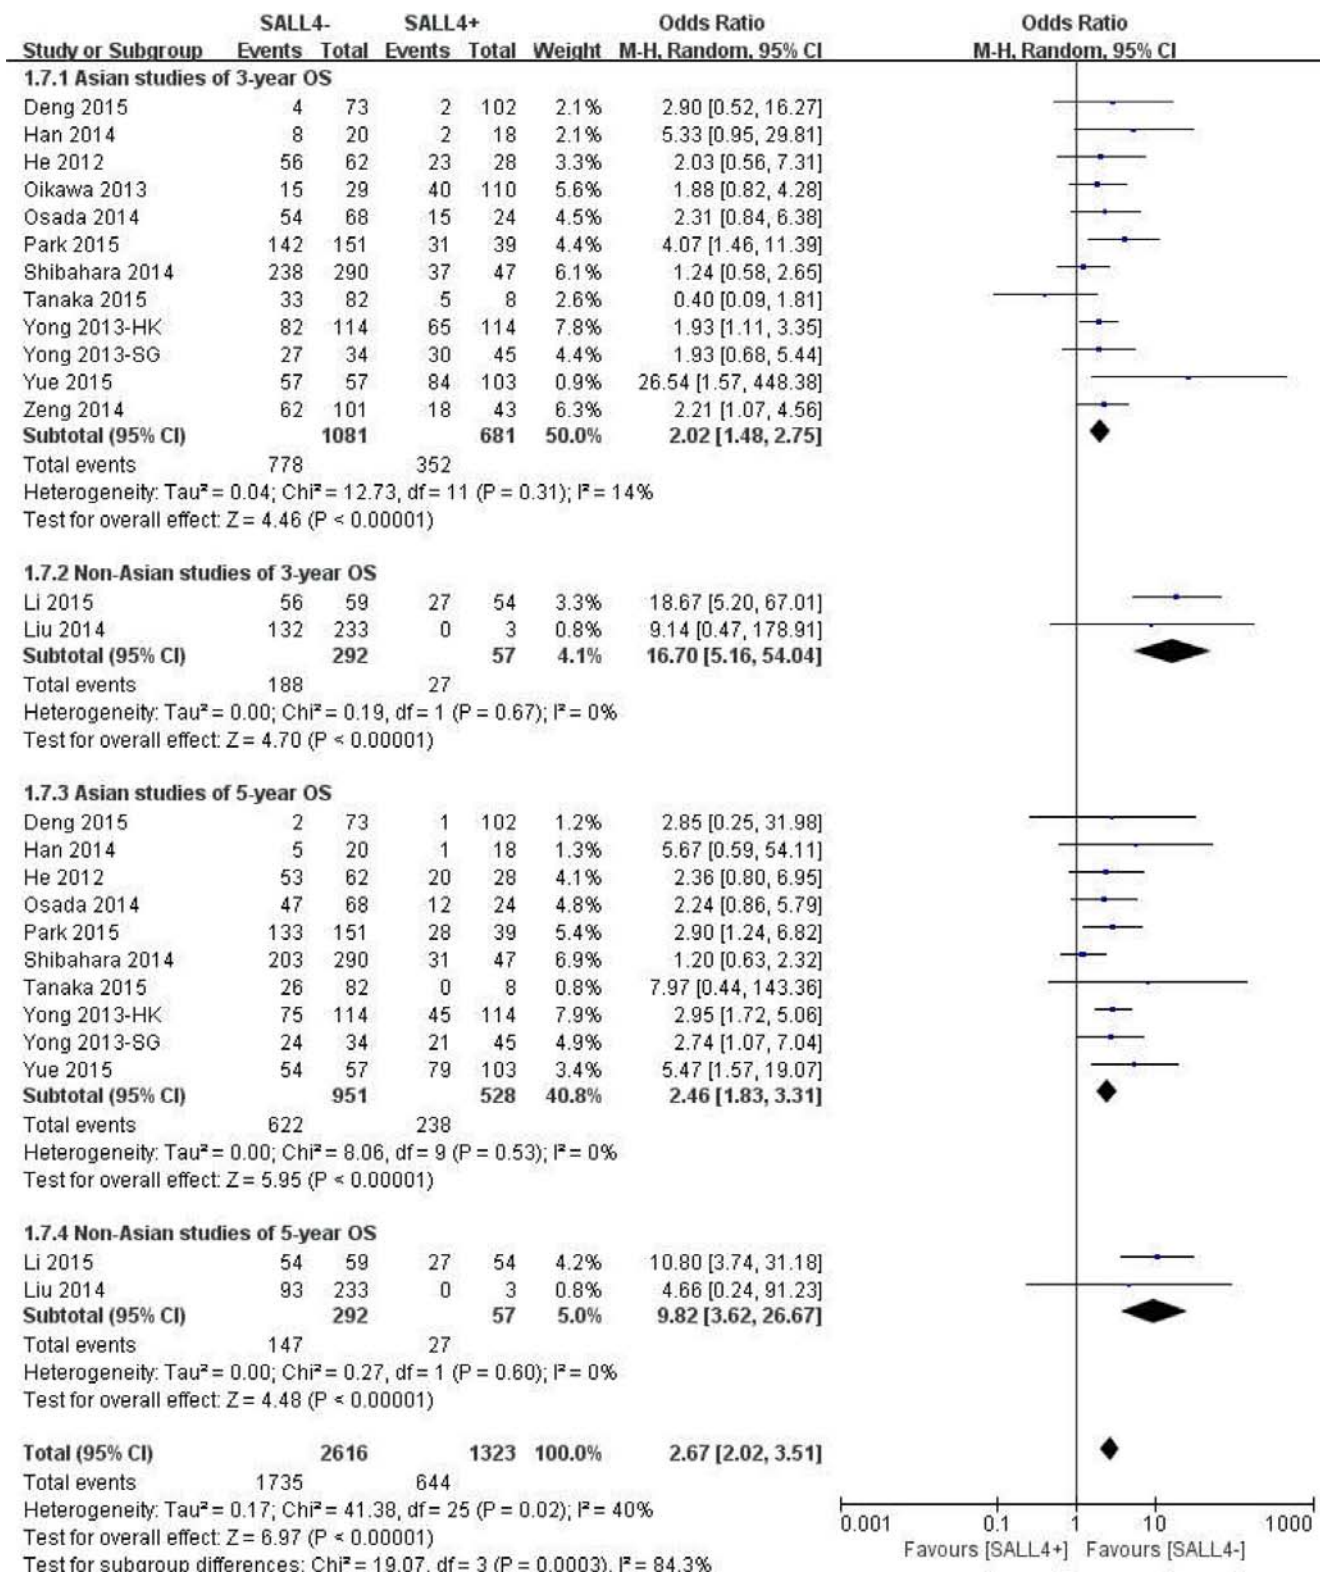

Supplementary Figure S3: The correlation between SALL4 expression and prognosis based on different source regions.

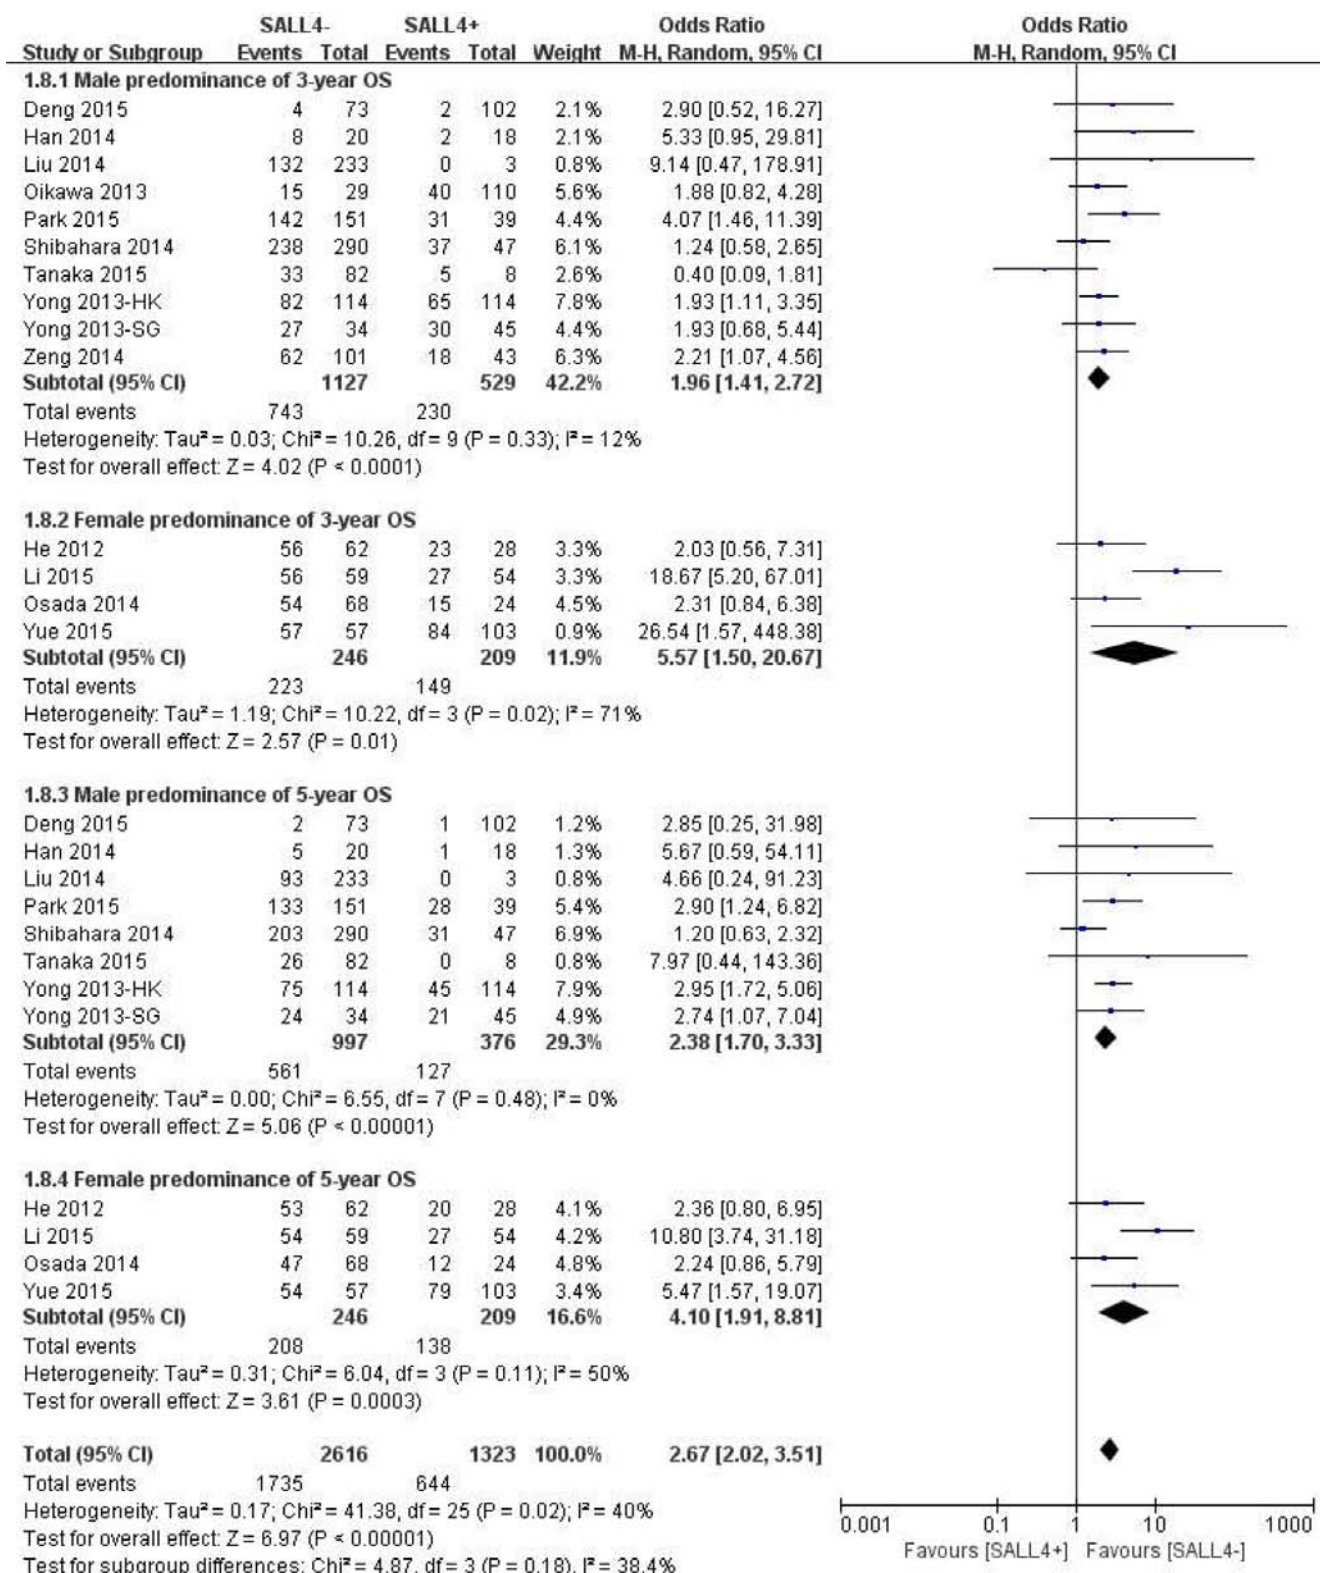

Supplementary Figure S4: The correlation between SALL4 expression and prognosis based on different sex predominance.

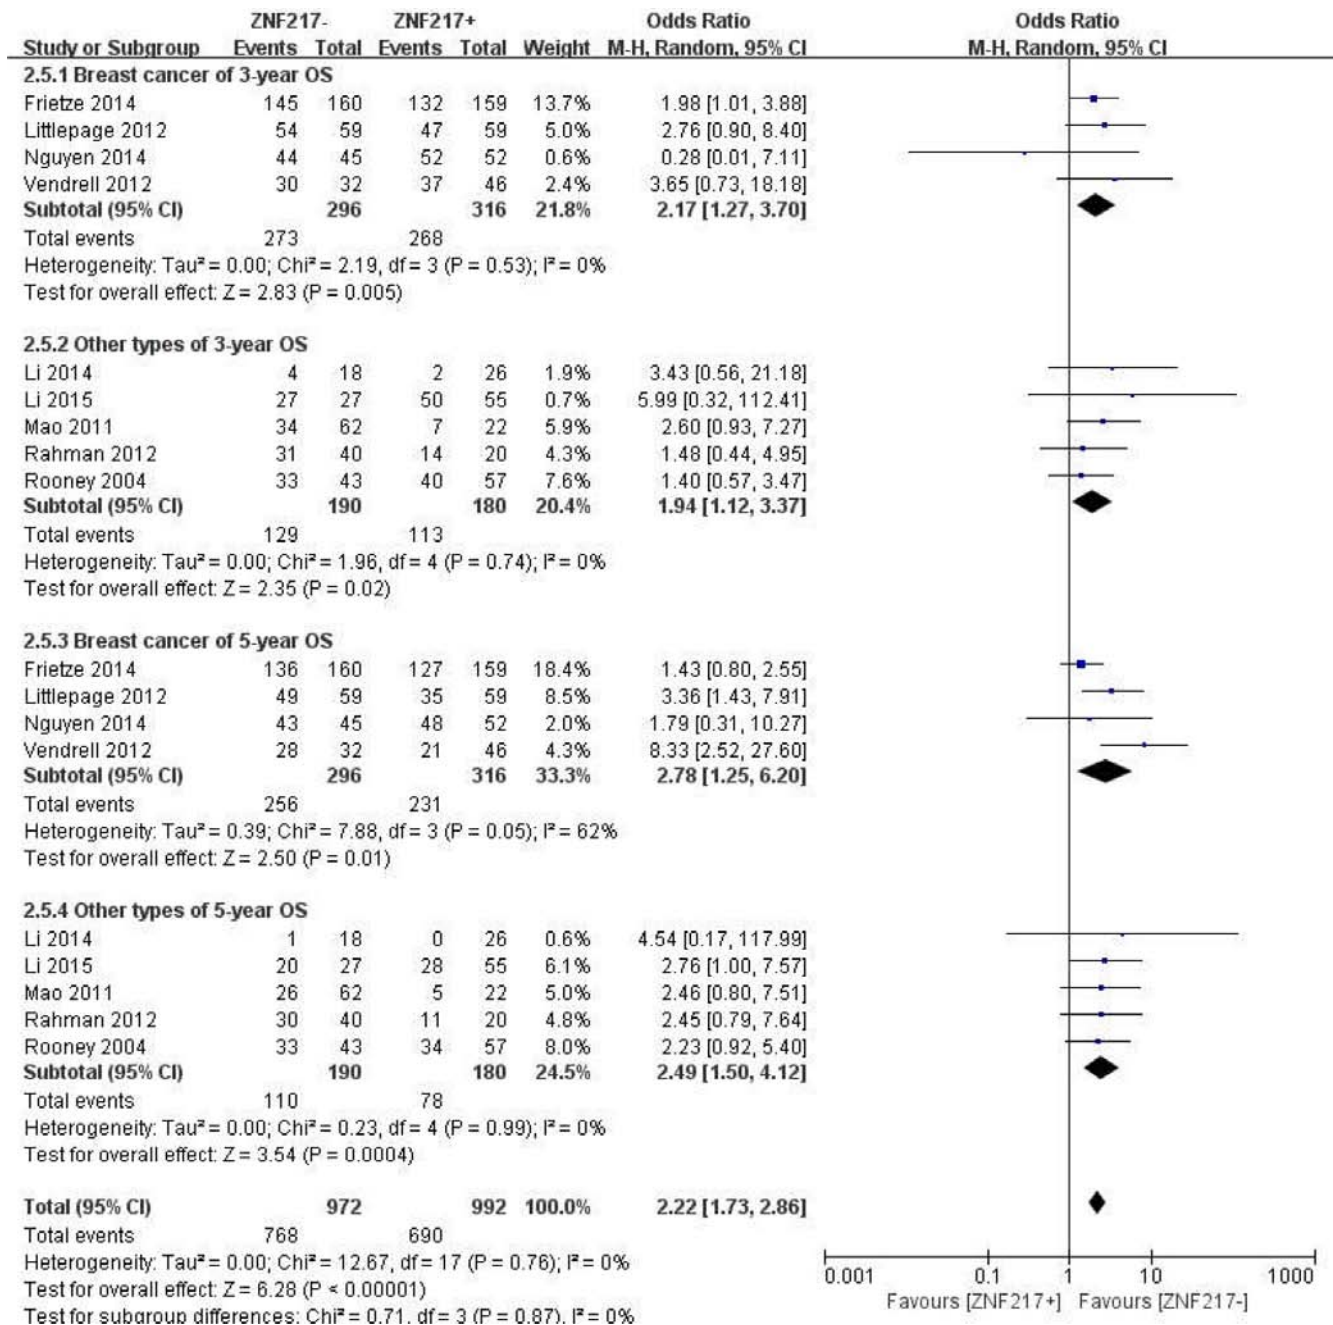

Supplementary Figure S5: The correlation between ZNF217 expression and prognosis based on different cancer types.

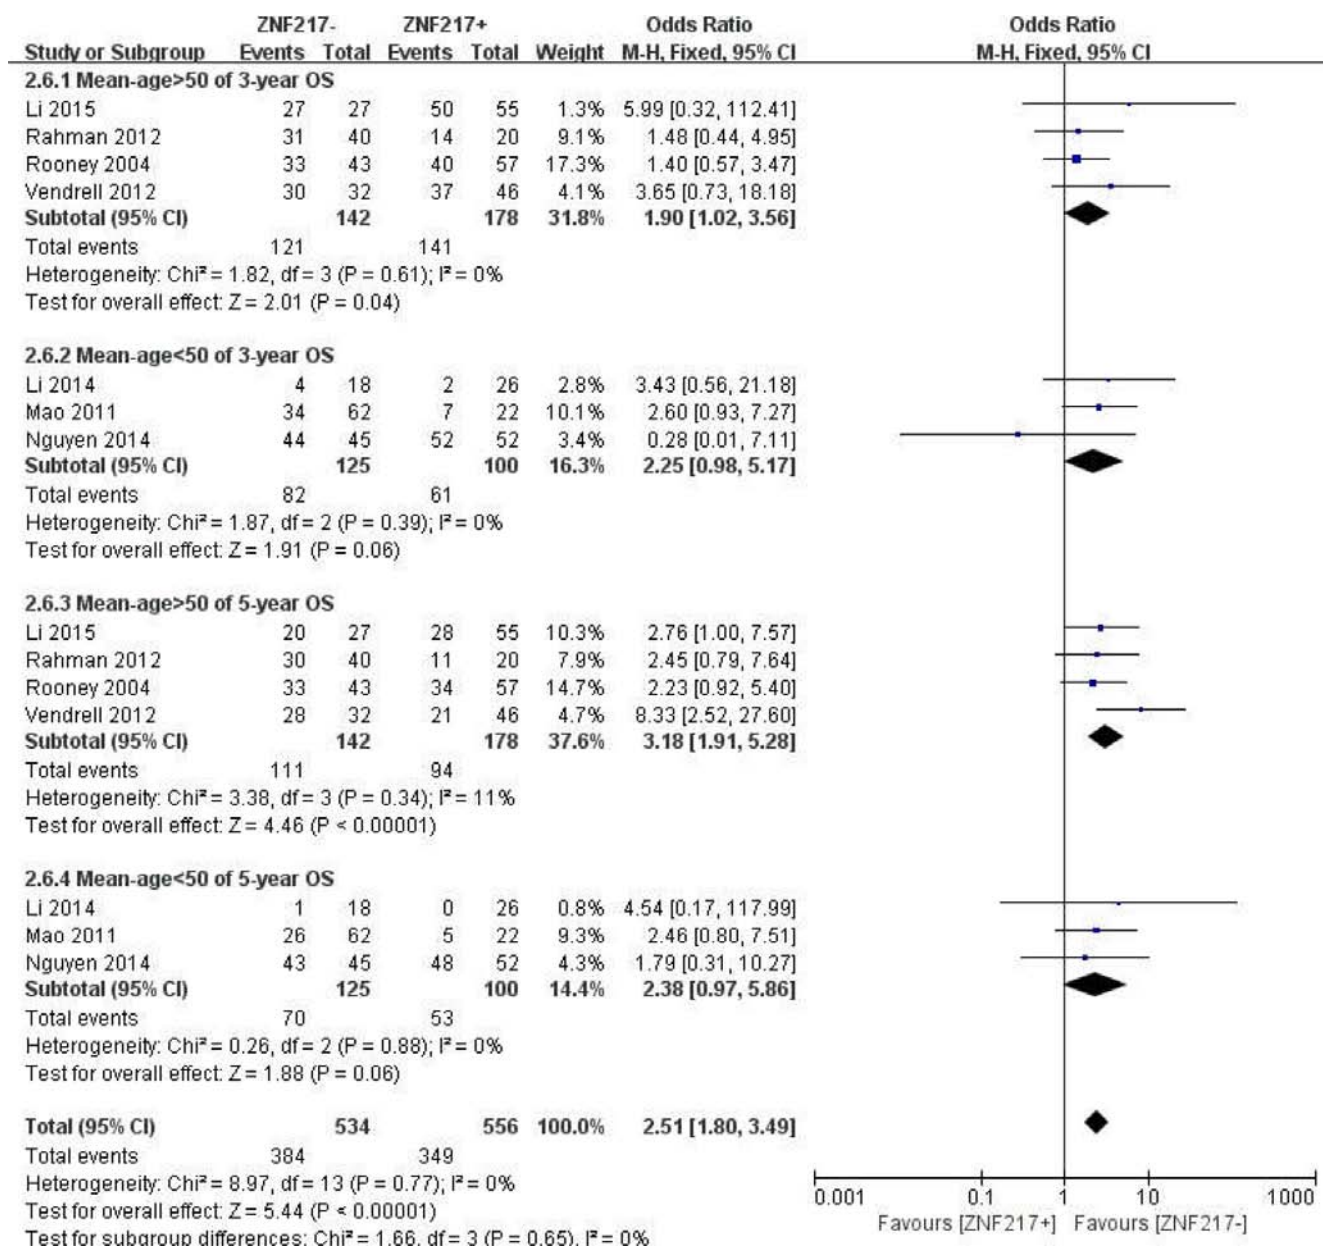

Supplementary Figure S6: The correlation between ZNF217 expression and prognosis based on different mean-age.

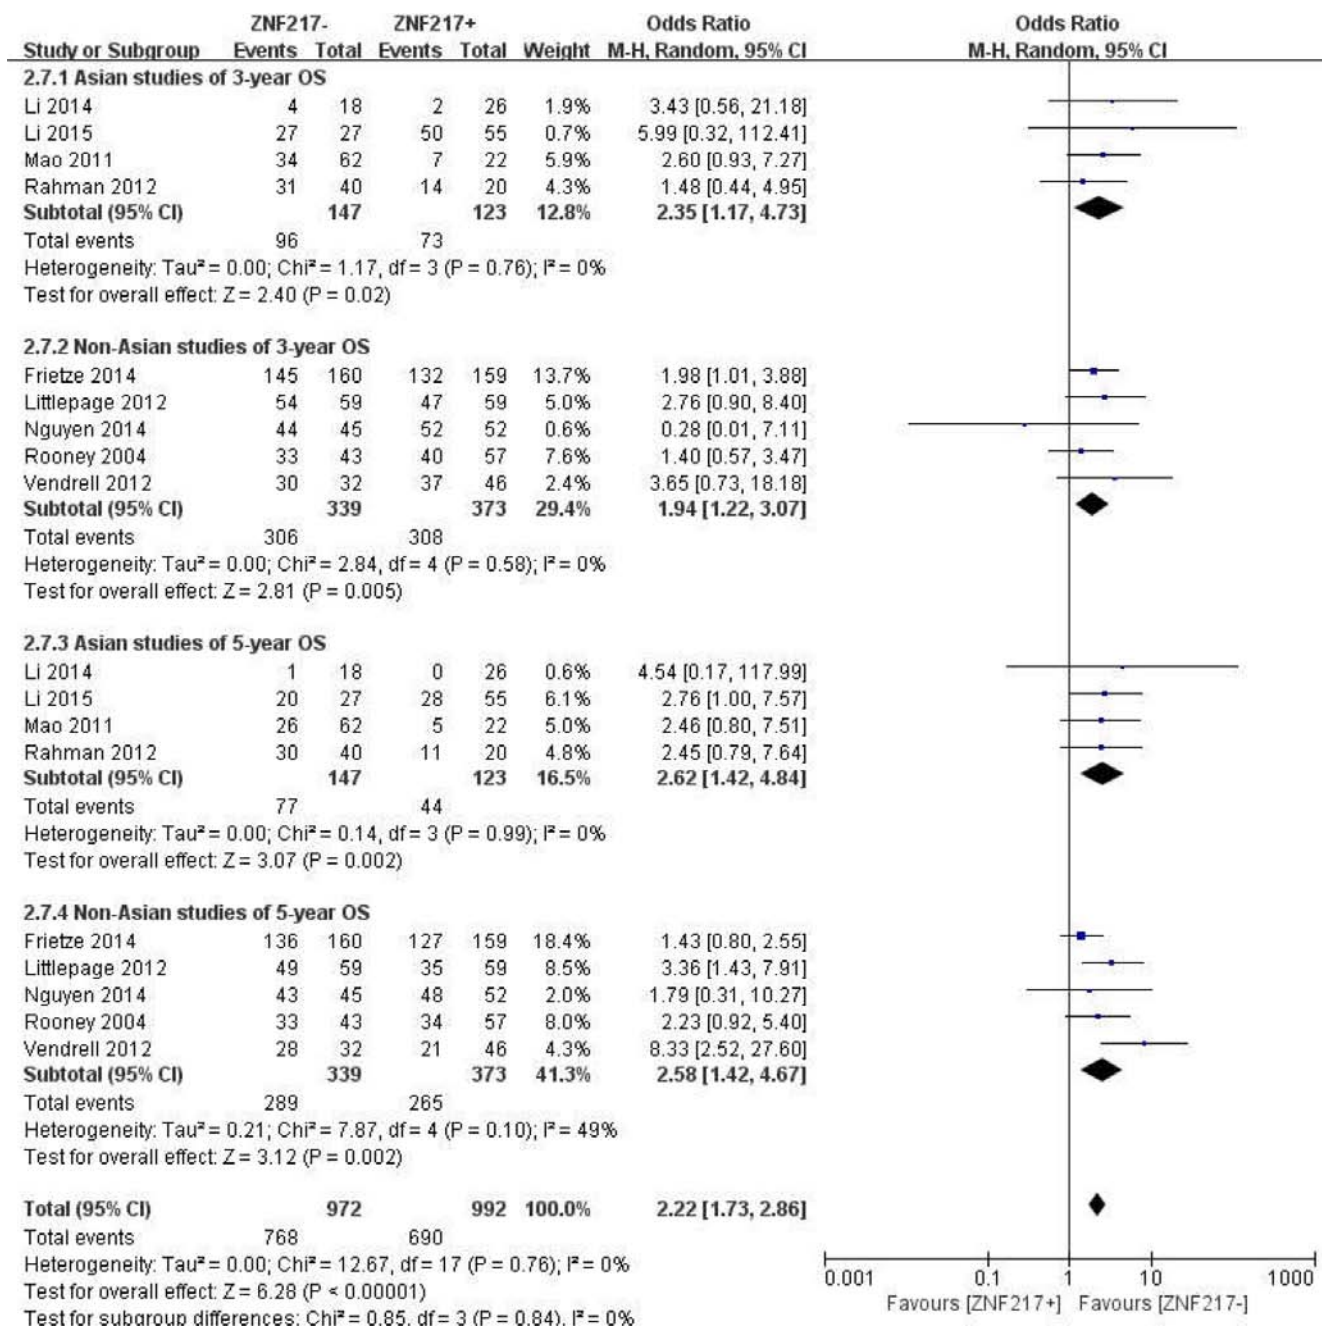

Supplementary Figure S7: The correlation between ZNF217 expression and prognosis based on different source regions.

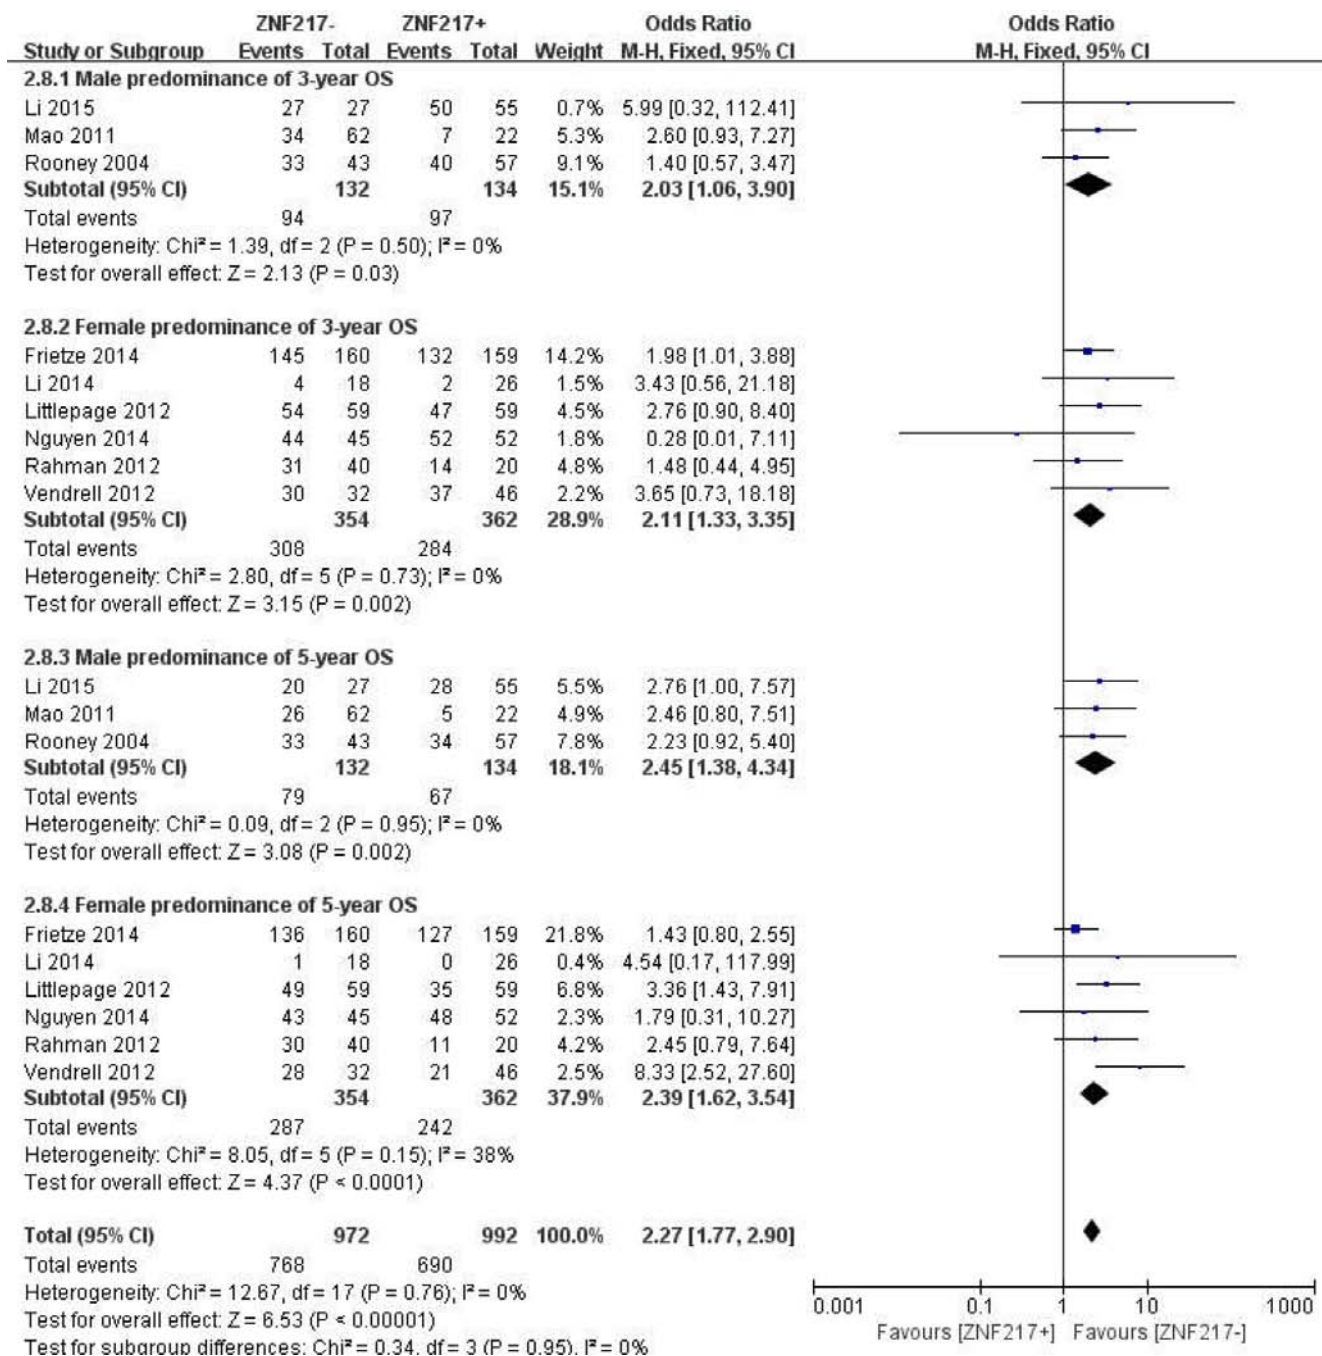

Supplementary Figure S8: The correlation between ZNF217 expression and prognosis based on different sex predominance.
